# Supplementary material for: Advantages of a city-scale emission inventory for urban air quality research and policy: the case of Nanjing, a typical industrial city in the Yangtze River Delta, China
Source: Copernicus journal article supplement (doi:10.5194/acp-15-12623-2015), 2015-11-12
Supplement: Supplementary file 1 [file acp-15-12623-2015-supplement.pdf]

Supplement of Atmos. Chem. Phys., 15, 12623–12644, 2015  
<http://www.atmos-chem-phys.net/15/12623/2015/>  
doi:10.5194/acp-15-12623-2015-supplement  
© Author(s) 2015. CC Attribution 3.0 License.

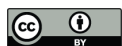

Atmospheric  
Chemistry  
and Physics  
Open Access  
EGU

*Supplement of*

## **Advantages of a city-scale emission inventory for urban air quality research and policy: the case of Nanjing, a typical industrial city in the Yangtze River Delta, China**

**Y. Zhao et al.**

*Correspondence to:* Y. Zhao (yuzhao@nju.edu.cn)

The copyright of individual parts of the supplement might differ from the CC-BY 3.0 licence.

**Number of tables: 5**

**Number of figures: 10**

### **Table list**

Table S1. Summary of activity levels by sector for Nanjing emission inventory 2010-2012.

Table S2. Technology distribution by vehicle type (share of each technology level out of each vehicle type) in Nanjing, for the year 2012.

Table S3. Annual average vehicle kilometers traveled (VKT), average age and average accumulated mileage of the fleet in Nanjing, for the year 2012.

Table S4. The unabated emission factors (EF) for power plant and typical industrial sources. The numbers for BC and OC are the mass fractions of corresponding carbonaceous aerosol species to PM<sub>2.5</sub> (dimensionless). The units for other species are kg/t-coal for coal-fired power plant and cement clinker production, and kg/t-product for other sources unless specifically noted.

Table S5. The emissions (estimated by this work) and ambient concentrations (Yu et al., 2014) of SO<sub>2</sub>, NO<sub>x</sub>/NO<sub>2</sub>, PM<sub>2.5</sub>, PM<sub>10</sub> and CO for August 16-24, 2012 and August 16-24, 2013 (the period of Youth Asian Games, 2013) in Nanjing.

### **Figure list**

Figure S1. The location of Nanjing (a), selected emission sources in the city (b) and (c), and the 9 state-operated observation sites in the city (d).

Figure S2. Source contributions to the total emissions by species and those to coal consumption in Nanjing from 2010 to 2012. Recall from Section 2.1 of the main text that CPP represents coal-fired power plants, IND total industry, ISP iron & steel plants, CEM cement plants, RCP refineries and chemical plants, OIN other industry plants, SOL solvent use, RES residential & commercial sector, TRA transportation, and FUD fugitive dust.

Figure S3. (a) Monthly variation of SO<sub>2</sub> emissions by source from MEIC (2010) and our estimates (2012). A and B refer to MEIC and our estimates, respectively. (b) Monthly variation of emissions by species from our estimates (2012).

Figure S4. Diurnal variation of on-road transportation emissions by species for Nanjing, 2012.

Figure S5. The inter-annual trends in meteorological parameters in Nanjing, obtained from China Meteorological Data Sharing Service System (<http://cdc.nmic.cn/>). All the data are normalized to 2010 level.

Figure S6. Spatial distribution of summer NO<sub>2</sub> vertical column density (VCD) from OMI for Jiangsu, Shanghai, Zhejiang and Anhui provinces, 2010. The resolution is 0.125°×0.125°.

Figure S7. Time series of ambient OC to EC ratios measured by Li et al. (2015). Every point represents a single sampling day. The red points indicate the observed lowest OC to EC ratios and thereby the (OC/EC)<sub>pri</sub> for the four seasons.

Figure S8. Cumulative probability distribution of daily CO concentrations in Caochangmen for winter 2012.

Figure S9. Comparisons of histograms of hourly CO concentrations observed at Caochangmen site and Shanxilu site for the year 2012 and 2014.

Figure S10. The penetrations of technologies and inter-annual trends of emission factors for typical sources in Nanjing from 2010 to 2012. In each panel, left-hand vertical axis indicates the percentages of various technologies and right-hand vertical axis indicates the relative changes of emission factors for various species.

## Tables

**Table S1. Summary of activity levels by sector for Nanjing emission inventory 2010-2012. Unless noted, the data are obtained from the databases of Environmental Statistics and Pollution Source Census, or Nanjing Statistical Yearbook.**

| Sector                        | Parameter                                                          | 2010    | 2011             | 2012                 |
|-------------------------------|--------------------------------------------------------------------|---------|------------------|----------------------|
| Power plant                   | Electricity generation/10 <sup>7</sup> kWh                         | 3262    | 4832             | 5147                 |
|                               | Coal consumption/Million metric tons (Mt)                          | 18.2    | 23.0             | 22.8                 |
| Iron & steel plant            | Coke production/Kilo metric tons (kt)                              | 3931    | 4022             | 4446                 |
|                               | Iron production/kt                                                 | 10345   | 11330            | 12143                |
|                               | Steel production/kt                                                | 10541   | 11518            | 12257                |
|                               | Coal consumption/kt                                                | 7748    | 7856             | 8074                 |
| Cement                        | Clinker production/kt                                              | 9428    | 8085             | 9268                 |
|                               | Cement production/kt                                               | 9802    | 9512             | 10298                |
|                               | Coal consumption/kt                                                | 1264    | 1200             | 1536                 |
| Refineries and chemical plant | Gasoline production/kt                                             | 2437    | 2417             | 2682                 |
|                               | Diesel production/kt                                               | 6937    | 6409             | 5828                 |
|                               | Kerosene production/kt                                             | 1656    | 2013             | 2316                 |
|                               | Liquefied petroleum gas production/kt                              | 1013    | 1096             | 1077                 |
| Other industry plant          | Waste incineration/metric tons (t)                                 | 20012   | 19622            | 19748 <sup>a</sup>   |
|                               | Municipal solid waste landfill/t                                   | 1771700 | 1963500          | 1976091 <sup>a</sup> |
|                               | Coal consumption/kt                                                | 2875    | 581              | 1047                 |
| Residential & commercial      | Coal consumption/kt                                                | 298     | 298              | 298                  |
| Gas station                   | Gasoline sales/kt                                                  | 854     | 953 <sup>b</sup> | 1092 <sup>b</sup>    |
| Fugitive dust                 | Construction site area/10 <sup>4</sup> m <sup>2</sup> <sup>c</sup> | 4760    | 5663             | 6050                 |

**Table S1. Continued.**

| Sector         | Parameter                                 | 2010   | 2011   | 2012    |
|----------------|-------------------------------------------|--------|--------|---------|
| Solvent use    | Coating-architecture/t <sup>d</sup>       | 21115  | 23962  | 24224   |
|                | Coating-vehicle production/t <sup>e</sup> | 7259   | 6833   | 7300    |
|                | Coating-vehicle repair/t <sup>f</sup>     | 3604   | 7338   | 8547    |
|                | Adhesive-architecture/t <sup>d</sup>      | 53019  | 60167  | 60825   |
|                | Adhesive-wood processing/t <sup>g</sup>   | 46584  | 49017  | 62445   |
| Transportation | Gasoline vehicle population               | 738485 | 875460 | 1066010 |
|                | Diesel vehicle population                 | 79734  | 89201  | 98309   |
|                | Motorcycle population                     | 355208 | 344758 | 335830  |
|                | Railway freight tonnage originated/kt     | 15936  | 18205  | 18058   |
|                | Air transportation-total cargo/kt         | 234    | 247    | 248     |

<sup>a</sup> Scaled based on resident population of the city.

<sup>b</sup> Scaled based on vehicle population of the city.

<sup>c</sup> Internal data from local Environmental Protection Agency

<sup>d</sup> Calculated based on the building area of the city.

<sup>e</sup> Calculated based on the annual production of vehicles in the city.

<sup>f</sup> Calculated based on vehicle population of the city.

<sup>g</sup> Downscaled from national level based on gross domestic production (GDP).

**Table S2. Technology distribution by vehicle type (share of each technology level out of each vehicle type) in Nanjing, for the year 2012.**

| Vehicle type      |             | Pre-China I | China I | China II | China III | China IV |
|-------------------|-------------|-------------|---------|----------|-----------|----------|
| Passenger vehicle | Mini bus    | 13.39%      | 54.44%  | 6.65%    | 14.63%    | 10.89%   |
|                   | Light-duty  | 1.61%       | 8.91%   | 17.97%   | 37.43%    | 34.08%   |
|                   | Medium-duty | 28.11%      | 18.94%  | 32.40%   | 16.90%    | 3.65%    |
|                   | Heavy-duty  | 6.37%       | 14.45%  | 26.27%   | 42.98%    | 9.94%    |
| Truck             | Mini truck  | 2.86%       | 0.00%   | 57.14%   | 40.00%    | 0.00%    |
|                   | Light-duty  | 2.33%       | 22.01%  | 11.64%   | 46.24%    | 17.79%   |
|                   | Medium-duty | 15.84%      | 33.66%  | 16.87%   | 28.26%    | 5.37%    |
|                   | Heavy-duty  | 2.57%       | 12.15%  | 14.48%   | 56.39%    | 14.41%   |
| Motorcycle        |             | 14.62%      | 18.43%  | 44.69%   | 22.26%    | 0.00%    |
| Taxi              |             | 0.06%       | 0.00%   | 1.00%    | 44.49%    | 54.45%   |
| Bus               | Medium-duty | 0.00%       | 1.67%   | 23.96%   | 59.61%    | 14.76%   |
|                   | Heavy-duty  | 0.70%       | 4.36%   | 35.68%   | 57.15%    | 2.11%    |
| Sum               |             | 5.16%       | 12.46%  | 23.68%   | 34.10%    | 24.60%   |

**Table S3. Annual average vehicle kilometers traveled (VKT), average age and average accumulated mileage of the fleet in Nanjing, for the year 2012.**

|                               | Annual average<br>VKT (km) | Average age<br>(year) | Average accumulated<br>mileage (km) |
|-------------------------------|----------------------------|-----------------------|-------------------------------------|
| Minibus                       | 25574                      | 3.86                  | 98716                               |
| Light-duty passenger vehicle  | 25574                      | 3.86                  | 98716                               |
| Medium-duty passenger vehicle | 66400                      | 6.73                  | 446872                              |
| Heavy-duty passenger vehicle  | 66400                      | 6.73                  | 446872                              |
| Mini truck                    | 44000                      | 4.4                   | 193600                              |
| Light-duty truck              | 44000                      | 4.4                   | 193600                              |
| Medium-duty truck             | 63300                      | 7.23                  | 457659                              |
| Heavy-duty truck              | 105600                     | 3.93                  | 415008                              |
| Motorcycle                    | 7303                       | 6.42                  | 46885                               |
| Taxi                          | 138000                     | 2.18                  | 300840                              |
| Bus                           | 43940                      | 4.51                  | 198169                              |

**Table S4. The unabated emission factors (EF) for power plant and typical industrial sources. The numbers for BC and OC are the mass fractions of corresponding carbonaceous aerosol species to PM<sub>2.5</sub> (dimensionless). The units for other species are kg/t-coal for coal-fired power plant and cement clinker production, and kg/t-product for other sources unless specifically noted.**

| Sector                     | Process/source            | SO <sub>2</sub>        | NO <sub>x</sub>                  | PM <sub>2.5</sub>     | PM <sub>2.5-10</sub> | PM <sub>&gt;10</sub>  | BC                | OC                    | VOCs              | CO                              | CO <sub>2</sub>             |
|----------------------------|---------------------------|------------------------|----------------------------------|-----------------------|----------------------|-----------------------|-------------------|-----------------------|-------------------|---------------------------------|-----------------------------|
| Coal-fired power plant     | Pulverized combustion     | 19S/18S <sup>a</sup>   | 4.8/5.4/4.2/6.2/9.2 <sup>b</sup> | 0.4A <sup>c</sup>     | 1.1A <sup>c</sup>    | 5.4A <sup>c</sup>     | 0.01 <sup>c</sup> | 0 <sup>c</sup>        | 0.15 <sup>d</sup> | 0.7/2 <sup>e</sup>              | 2058/1358/2320 <sup>f</sup> |
|                            | Grate stoker              | 17S <sup>a</sup>       |                                  | 0.10A <sup>c</sup>    | 0.17A <sup>c</sup>   | 1.24A <sup>c</sup>    | 0.20 <sup>c</sup> | 0.04 <sup>c</sup>     |                   | 2.6 <sup>e</sup>                |                             |
|                            | Circulating fluidized bed | 12S <sup>a</sup>       |                                  | 0.45A <sup>c</sup>    | 1.09A <sup>c</sup>   | 3.26A <sup>c</sup>    | 0.01 <sup>c</sup> | 0 <sup>c</sup>        |                   | 2.1 <sup>e</sup>                |                             |
| Cement production          | Clinker production        | 5.1S <sup>g</sup>      | 13 <sup>g</sup>                  | 21 <sup>h</sup>       | 28 <sup>h</sup>      | 69 <sup>h</sup>       | 0.01 <sup>h</sup> | 0.02 <sup>h</sup>     | 1.4 <sup>d</sup>  | 12 <sup>e</sup>                 | 1731 <sup>f</sup>           |
|                            | Process                   |                        |                                  | 10 <sup>h</sup>       | 24 <sup>h</sup>      | 106 <sup>h</sup>      | 0.01 <sup>h</sup> | 0.02 <sup>h</sup>     |                   |                                 |                             |
| Iron & steel production    | Machinery coking          | 1.35 <sup>i</sup>      | 1.70 <sup>j</sup>                | 1.3 <sup>h</sup>      | 0.8 <sup>h</sup>     | 2.9 <sup>h</sup>      | 0.40 <sup>h</sup> | 0.35 <sup>h</sup>     | 2.40 <sup>k</sup> | 0.10 <sup>l</sup>               |                             |
|                            | Sintering                 | 2.82 <sup>g</sup>      | 0.64 <sup>g</sup>                | 3.29 <sup>h</sup>     | 3.76 <sup>h</sup>    | 39.95 <sup>h</sup>    | 0.01 <sup>h</sup> | 0.05 <sup>h</sup>     | 0.25 <sup>g</sup> | 11 <sup>e</sup>                 | 2067 <sup>f</sup>           |
|                            | Pig iron                  | 0.11/0.10 <sup>m</sup> | 0.17 <sup>g</sup>                | 7.32 <sup>h</sup>     | 5.86 <sup>h</sup>    | 35.6 <sup>h</sup>     | 0.19 <sup>h</sup> | 0.04 <sup>h</sup>     |                   | 4.20 <sup>l</sup>               |                             |
|                            | Steel                     |                        |                                  | 17.6/5.4 <sup>h</sup> | 5.2/1.6 <sup>h</sup> | 17.2/5.2 <sup>h</sup> |                   | 0.2/0.02 <sup>h</sup> | 0.06 <sup>g</sup> | 22 <sup>l</sup> /9 <sup>e</sup> |                             |
| Non-ferrous metal smelting | Aluminum                  | 6 <sup>m</sup>         |                                  | 17.1 <sup>h</sup>     | 8.6 <sup>h</sup>     | 19.4 <sup>h</sup>     |                   |                       |                   |                                 |                             |
|                            | Lead                      | 80 <sup>h</sup>        |                                  | 205 <sup>h</sup>      | 25 <sup>h</sup>      | 20 <sup>h</sup>       |                   |                       |                   |                                 |                             |
|                            | Copper                    | 212 <sup>h</sup>       |                                  | 211 <sup>h</sup>      | 25.8 <sup>h</sup>    | 20.6 <sup>h</sup>     |                   |                       |                   |                                 | 520 <sup>f</sup>            |
|                            | Zinc                      | 80 <sup>h</sup>        |                                  | 161 <sup>h</sup>      | 19.6 <sup>h</sup>    | 15.7 <sup>h</sup>     |                   |                       |                   |                                 | 1720 <sup>f</sup>           |
| Other production           | Brick                     | 0.53 <sup>m</sup>      | 0.13 <sup>m</sup>                | 0.27 <sup>h</sup>     | 0.44 <sup>h</sup>    | 2.99 <sup>h</sup>     | 0.40 <sup>h</sup> | 0.35 <sup>h</sup>     | 0.20 <sup>k</sup> | 150 <sup>e</sup>                | 1731 <sup>f</sup>           |
|                            | Lime                      | 1.0 <sup>h</sup>       | 1.6 <sup>h</sup>                 | 1.8 <sup>h</sup>      | 9 <sup>h</sup>       | 79.2 <sup>h</sup>     | 0.02 <sup>h</sup> | 0.04 <sup>h</sup>     |                   | 115 <sup>e</sup>                | 750/1731 <sup>f</sup>       |
|                            | Glass                     |                        |                                  | 9.65 <sup>h</sup>     | 0.42 <sup>h</sup>    | 0.53 <sup>h</sup>     |                   |                       | 4.4 <sup>k</sup>  |                                 | 200 <sup>f</sup>            |
|                            | Sulfuric acid             | 3.4 <sup>h</sup>       |                                  |                       |                      |                       |                   |                       |                   |                                 |                             |



**Table S4. Continued**

| Sector              | Process/source | SO <sub>2</sub>  | NO <sub>x</sub>  | PM <sub>2.5</sub> | PM <sub>2.5-10</sub> | PM <sub>&gt;10</sub> | BC | OC | VOCs             | CO               | CO <sub>2</sub>             |
|---------------------|----------------|------------------|------------------|-------------------|----------------------|----------------------|----|----|------------------|------------------|-----------------------------|
| Other<br>production | Nitric acid    |                  | 7.1 <sup>h</sup> |                   |                      |                      |    |    |                  |                  |                             |
|                     | Ammonia        | 3.0 <sup>h</sup> | 0.9 <sup>h</sup> |                   |                      |                      |    |    | 4.7 <sup>k</sup> | 142 <sup>e</sup> | 4582/3273/2104 <sup>f</sup> |
|                     | Refinery       | 0.9 <sup>h</sup> | 0.3 <sup>h</sup> | 0.10 <sup>h</sup> | 0.02 <sup>h</sup>    |                      |    |    | -                | 10 <sup>e</sup>  |                             |

<sup>a</sup> Zhao et al. (2010). S represents the sulfur content, in percent, of the coal as fired. Numbers for pulverized combustion indicate EFs for anthracite and bituminous combustion, respectively.

<sup>b</sup> Zhao et al. (2010). Numbers indicate EFs for tangentially-fired low NO<sub>x</sub> burner burning bituminous ( $\geq 300$ MW), swirl low NO<sub>x</sub> burner burning bituminous ( $\geq 300$ MW), low NO<sub>x</sub> burner burning bituminous (<300MW), burner without low NO<sub>x</sub> combustion burning bituminous (<300MW), and burner without low NO<sub>x</sub> combustion burning anthracite (<300MW), respectively. .

<sup>c</sup> Zhao et al. (2010). A represents the ash content, in percent, of the coal as fired.

<sup>d</sup> Bo et al. (2008).

<sup>e</sup> Zhao et al. (2012a). Numbers for pulverized combustion indicate EFs for units ( $\geq 200$ MW)/units (<200MW), respectively. The unit for brick and lime production is kg/t-coal.

<sup>f</sup> Zhao et al. (2012b). Numbers for coal-fired power plant indicate EFs for bituminous/lignite/anthracite combustion, respectively. Numbers for ammonia production indicate EFs for processes using coal/oil/gas as energy, respectively. Numbers for lime production indicate EFs for calcinations of carbonates (kg/t-lime) and combustion processes (kg/t-coal), respectively. The unit for brick production is kg/t-coal.

<sup>g</sup> Lei (2008).

<sup>h</sup> Zhao et al. (2013). The unit for cement is kg/t-production. Numbers for steel production indicate EFs for basic oxygen furnace/electric arc furnace, respectively.

<sup>i</sup> He (2006)

<sup>j</sup> Huo et al. (2012)

<sup>k</sup> Wei (2009)

<sup>l</sup> From onsite investigations in Nanjing.

<sup>m</sup> MEP (2010). Numbers for SO<sub>2</sub> from pig iron production indicate EFs for blast furnaces with gas volume over 2000 m<sup>3</sup>/350-2000 m<sup>3</sup>, respectively.

**Table S5. The emissions (estimated by this work) and ambient concentrations (Yu et al., 2014) of SO<sub>2</sub>, NO<sub>x</sub>/NO<sub>2</sub>, PM<sub>2.5</sub>, PM<sub>10</sub> and CO for August 16-24, 2012 and August 16-24, 2013 (the period of Youth Asian Games, 2013) in Nanjing.**

|                                     |                 | SO <sub>2</sub> | NO <sub>x</sub> /NO <sub>2</sub> | PM <sub>2.5</sub> | PM <sub>10</sub> | CO    |
|-------------------------------------|-----------------|-----------------|----------------------------------|-------------------|------------------|-------|
| Emissions (metric tons)             | Aug 16-24, 2012 | 3387            | 5073                             | 1814              | 2365             | 21087 |
|                                     | Aug 16-24, 2013 | 2608            | 3501                             | 1433              | 2034             | 14128 |
|                                     | Reduction rate  | 23%             | 31%                              | 21%               | 14%              | 33%   |
| Concentrations (ug/m <sup>3</sup> ) | Aug 16-24, 2012 | 27              | 41                               | 43                | 89               | 896   |
|                                     | Aug 16-24, 2013 | 21              | 30                               | 38                | 73               | 699   |
|                                     | Reduction rate  | 22%             | 27%                              | 18%               | 12%              | 22%   |

# Figures

## Figure S1.

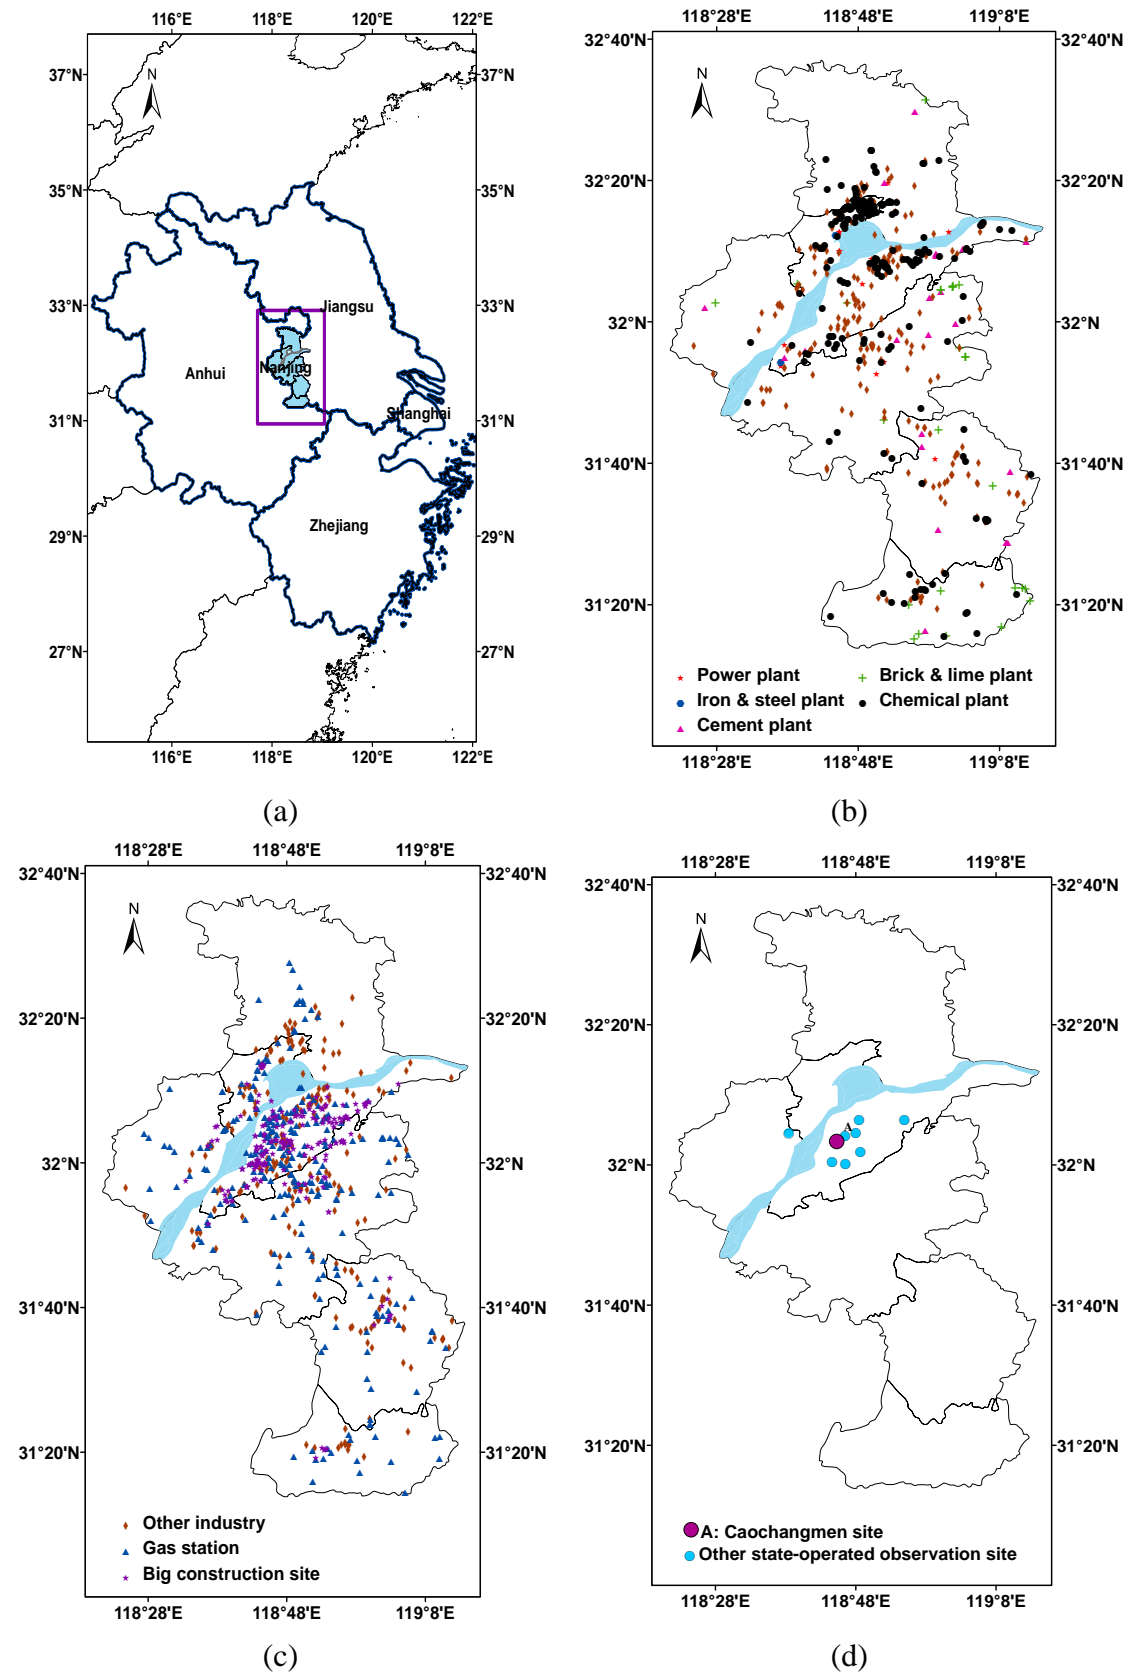

Figure S2.

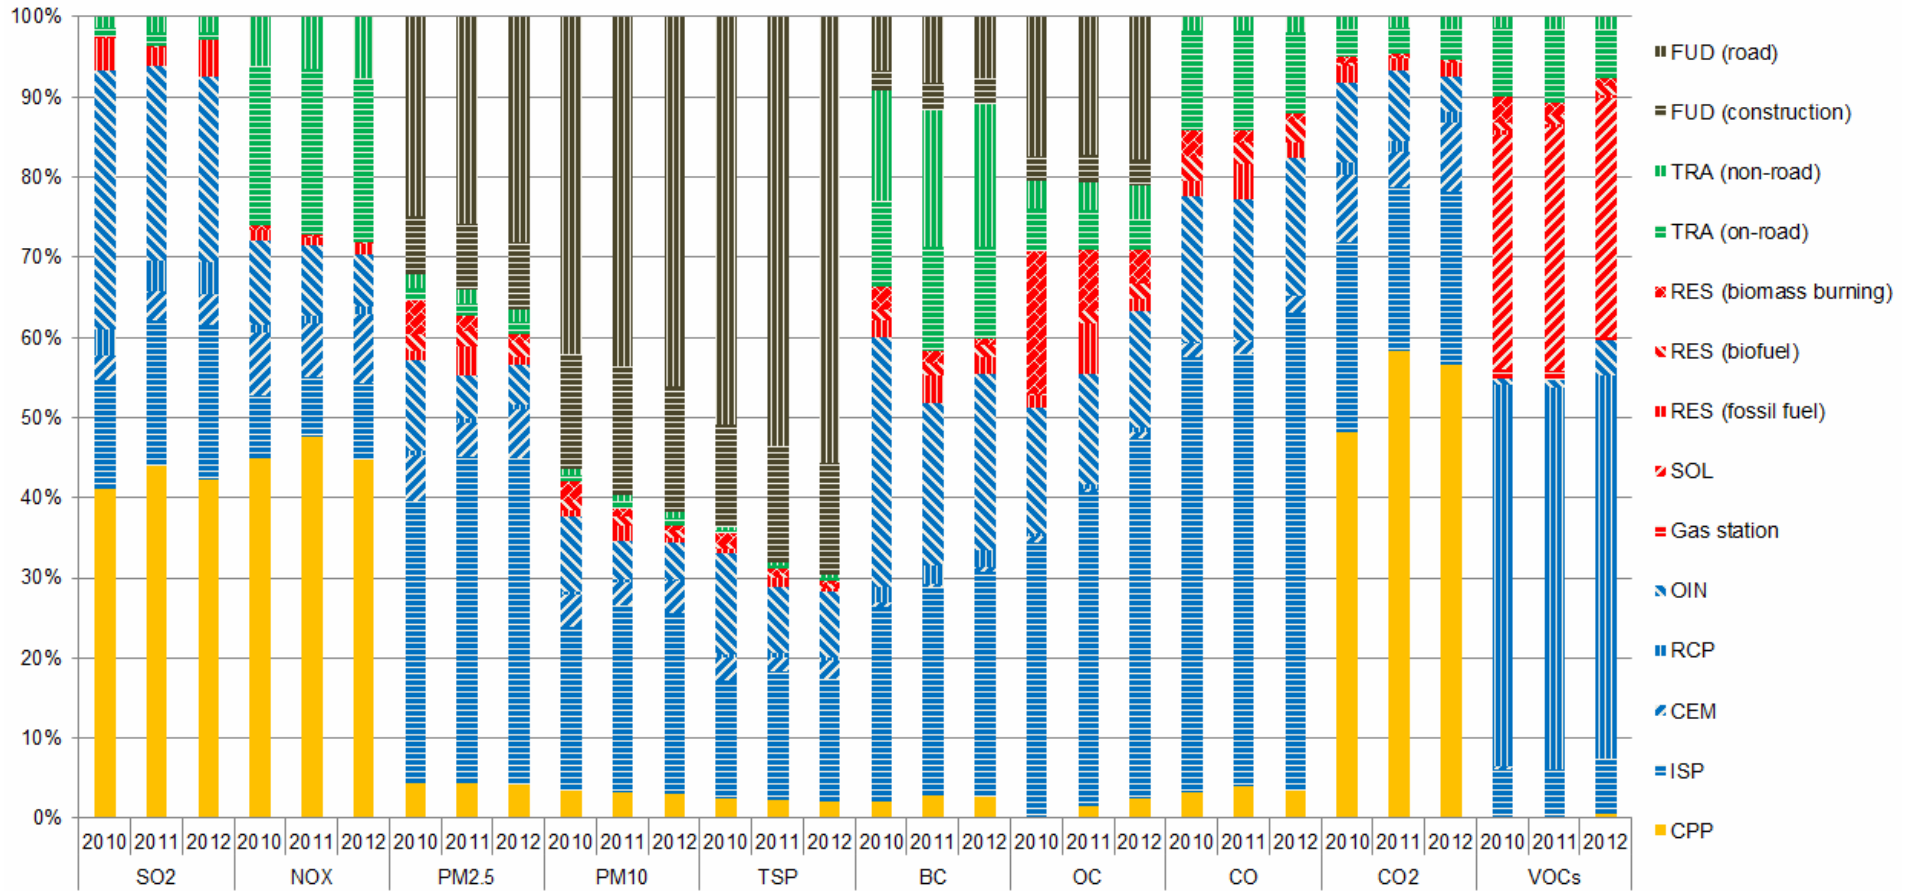

Figure S3.

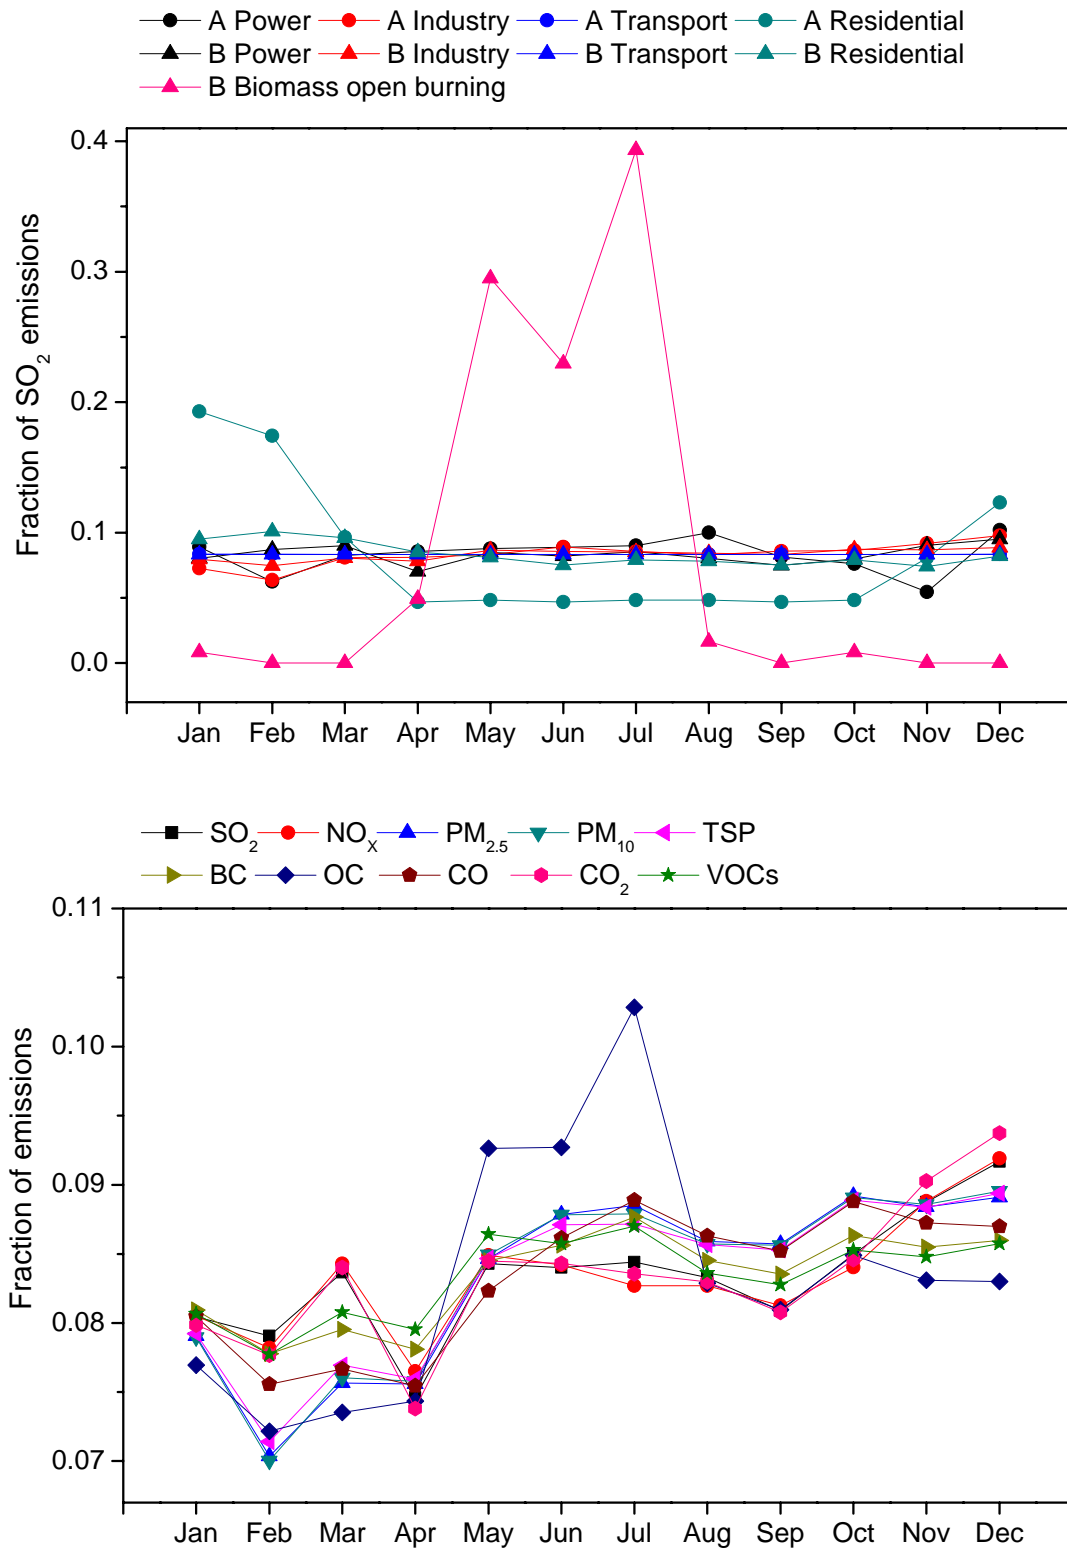

Figure S4.

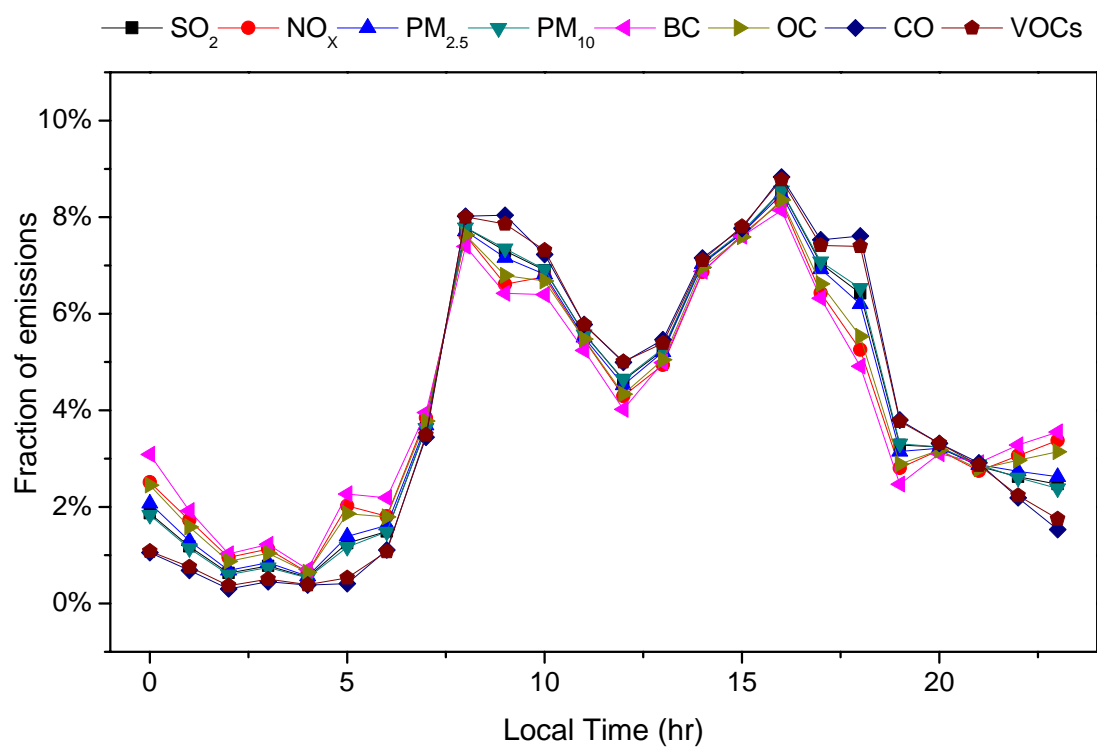

Figure S5.

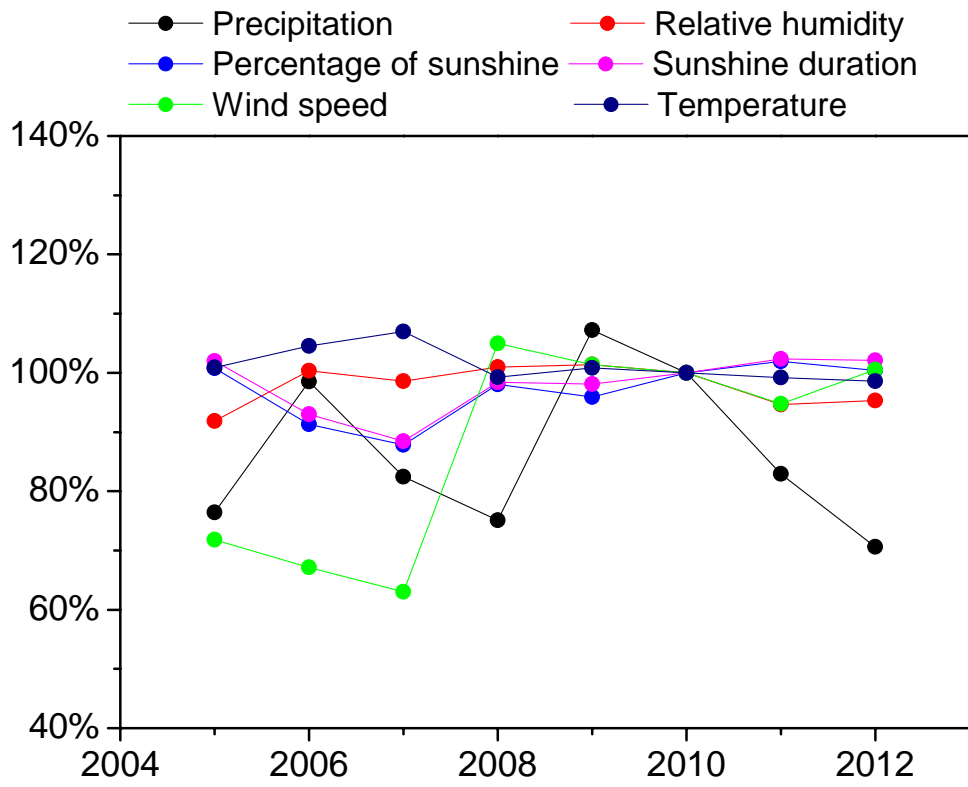

Figure S6.

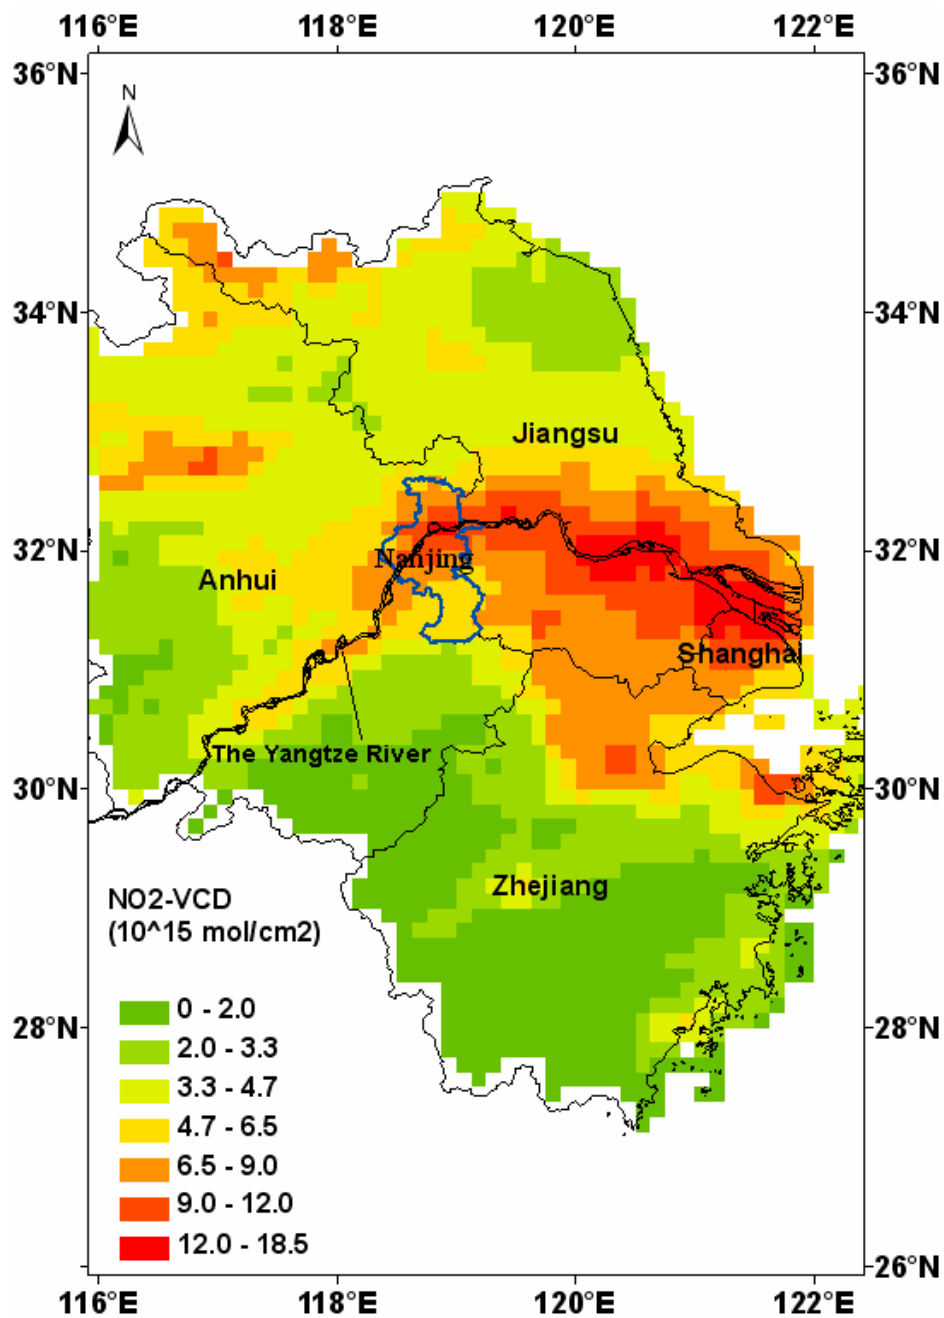



Figure S7.

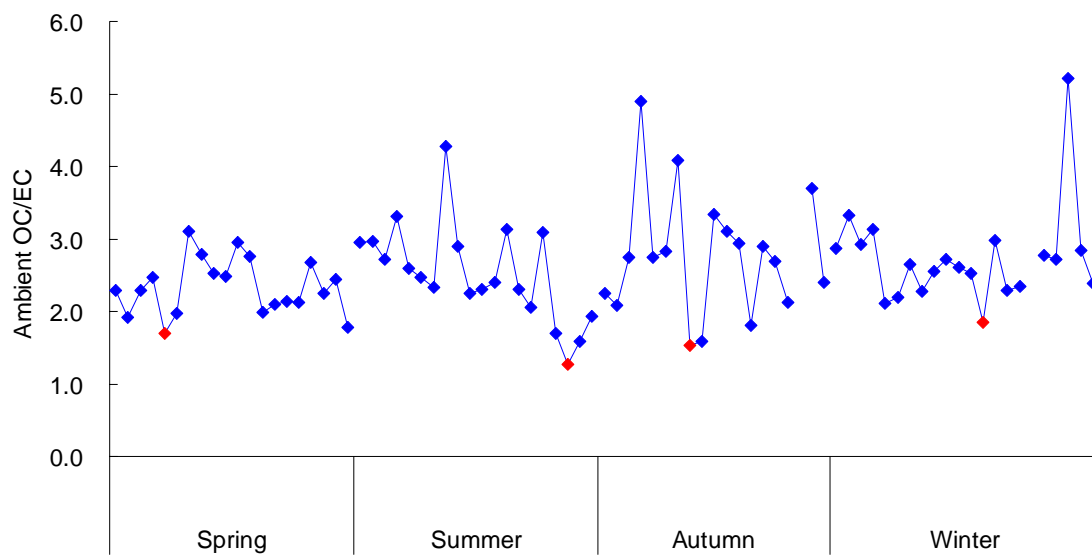

Figure S8.

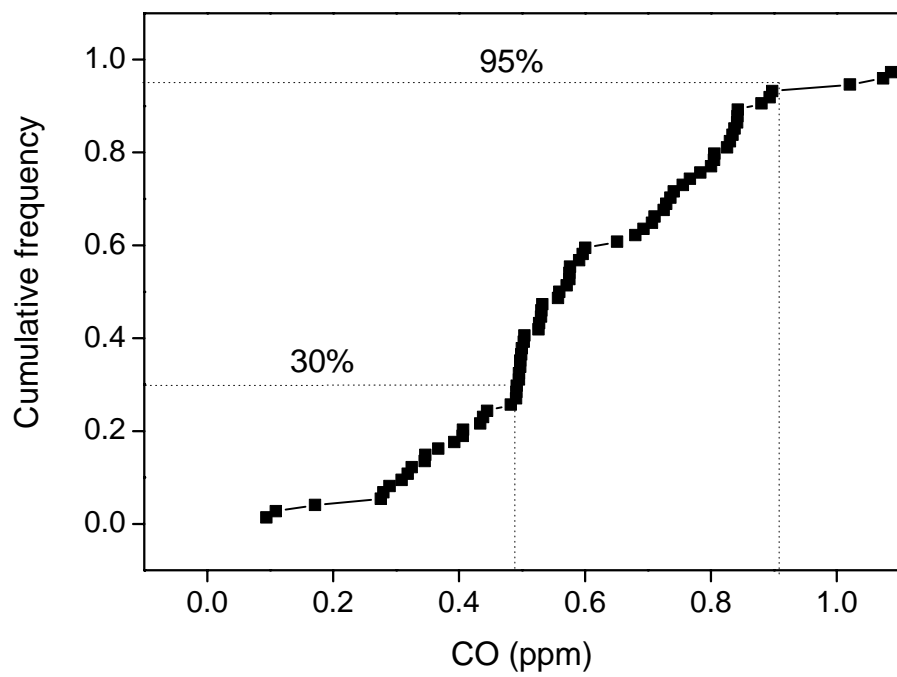

Figure S9.

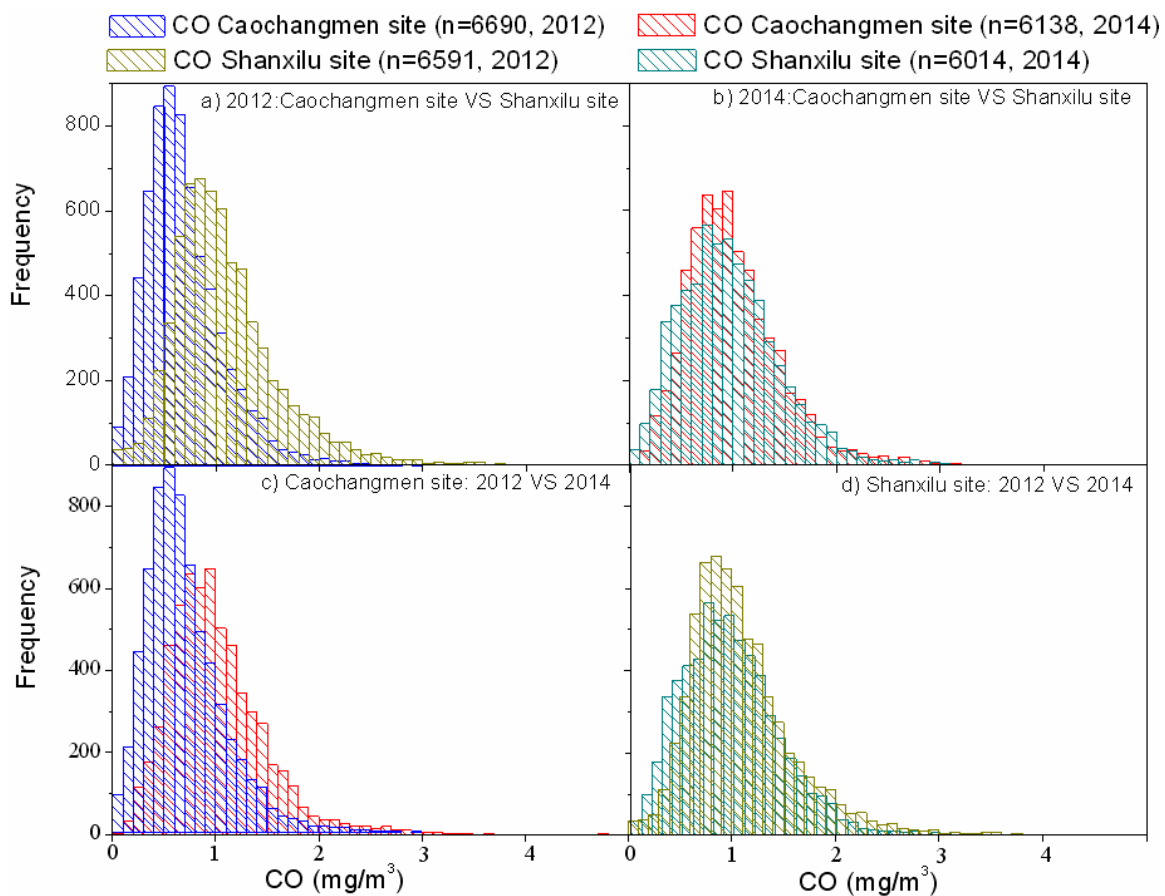

Figure S10.

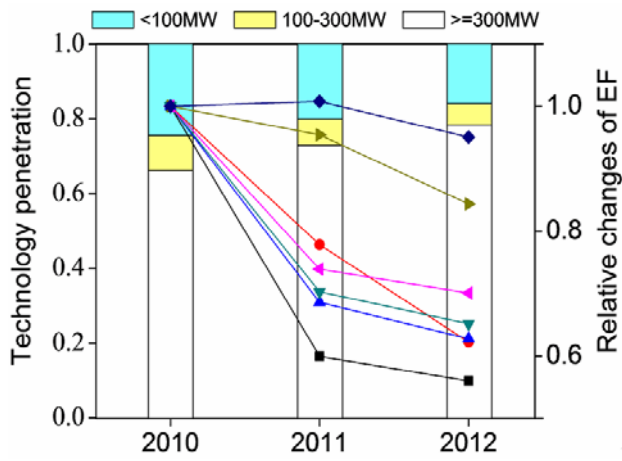

(a) Power plant

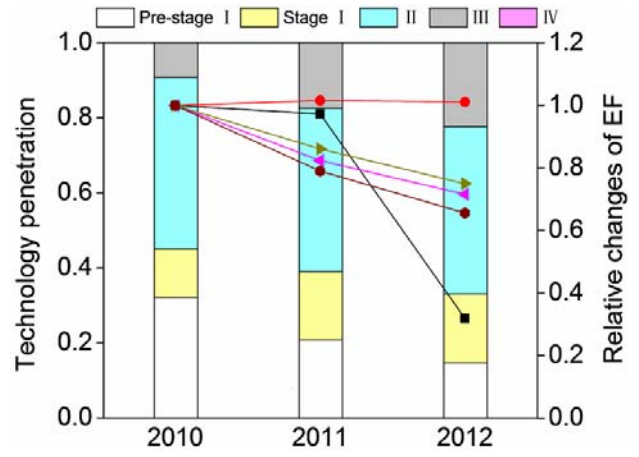

(b) Gasoline vehicles

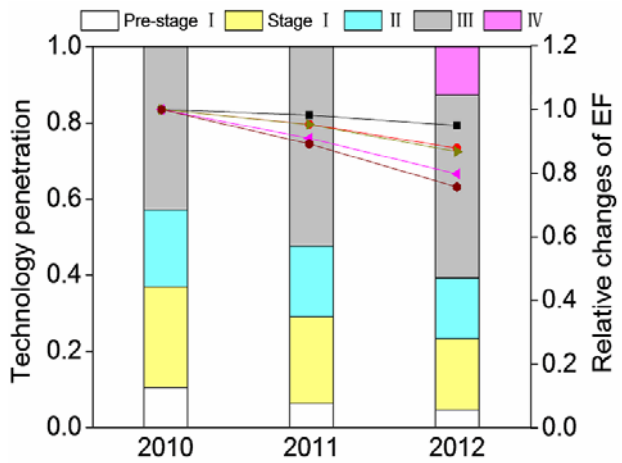

(c) Diesel vehicles

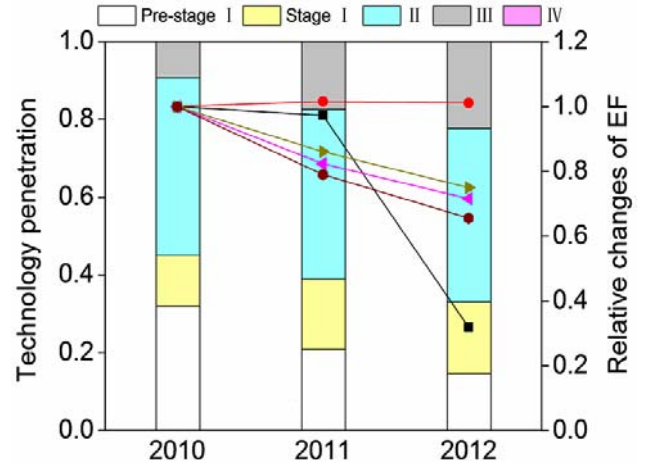

(d) Motorcycles

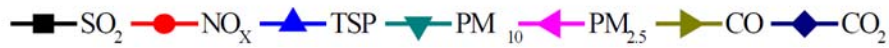

## References

Bo, Y., Cai, H., and Xie, S.: Spatial and temporal variation of historical anthropogenic NMVOCs emission inventories in China. *Atmos. Chem. Phys.*, 8, 7297-7316, 2008.

He, Q.: Composite Characteristics, Emission Factors, and Emission Estimates of Particulates and Volatile Organic Compound from Coke Making in China, Ph. D thesis, Chinese Academy of Sciences, Beijing, 2006 (in Chinese).

Huo, H., Lei, Y., Zhang, Q., Zhao, L., and He, K.: China's coke industry: Recent policies, technology shift, and implication for energy and the environment, *Energ. Policy*, 51, 397-404, 2012.

Lei, Y.: Research on Anthropogenic Emissions and Control of Primary Particles and Its Key Chemical Components, Ph. D thesis, Tsinghua University, Beijing, 2008 (in Chinese).

Li, B., Zhang, J., Zhao, Y., Yuan, S. Y., Zhao, Q. Y., Shen, G. F., and Wu, H. S.: Seasonal variation of urban carbonaceous aerosols in a typical city Nanjing in Yangtze River Delta, China, *Atmos. Environ.*, 106, 223-231, 2015.

Ministry of Environmental Protection of the People's Republic of China (MEP): Discharge coefficients of industrial pollutants in the First National General Survey of Pollution Sources (Survey Handbook). Office of Leading Group of the State Council on the First National Census on Pollution Sources, Beijing, 2010 (in Chinese).

Wei, W.: Research and Forecast on Chinese Anthropogenic Emissions of Volatile Organic Compounds, Ph. D thesis, Tsinghua University, Beijing, 2009(in Chinese).

Yu, Y. Y., Xie, F. J., Lu, X. B., Zhu, Z. F., and Shu, Y.: The environmental air quality condition and the reason analysis during the Asian Youth Games of Nanjing, *Environmental Monitoring and Forewarning*, 6, 5-17, 2014 (in Chinese).

Zhao, Y., Wang, S. X., Nielsen, C. P., Li, X. H., and Hao, J. M.: Establishment of a database of emission factors for atmospheric pollutants from Chinese coal-fired power plants, *Atmos. Environ.*, 44, 1515-1523, 2010.

Zhao, Y., Nielsen, C. P., McElroy, M. B., Zhang, L., and Zhang, J.: CO emissions in China: uncertainties and implications of improved energy efficiency and emission control, *Atmos. Environ.*, 49, 103-113, 2012a.

Zhao, Y., Nielsen, C. P., and McElroy, M. B.: China's CO<sub>2</sub> emissions estimated from the bottom up: Recent trends, spatial distributions, and quantification of uncertainties, *Atmos. Environ.*, 59, 214-223, 2012b.

Zhao, Y., Zhang, J., and Nielsen, C. P.: The effects of recent control policies on trends in emissions of anthropogenic atmospheric pollutants and CO<sub>2</sub> in China. *Atmos. Chem. Phys.*, 13, 487-508, 2013.
